# Supplementary material
Source: PubMed Central journal article supplement (PMC6688960)

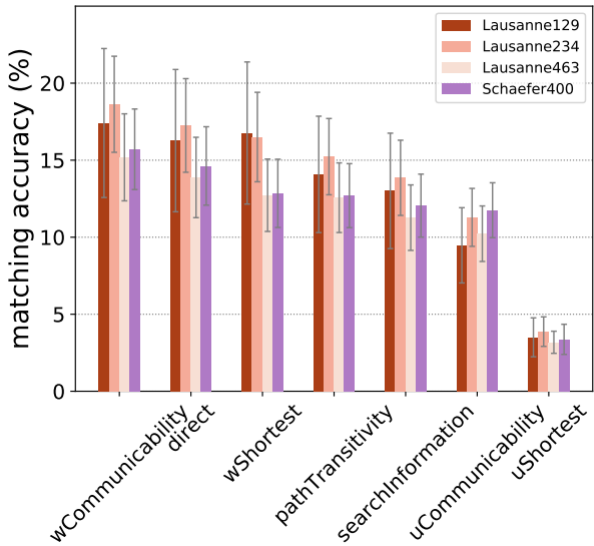

Supplement: NIHMS1530714-supplement-1.pdf [file NIHMS1530714-supplement-1.pdf]

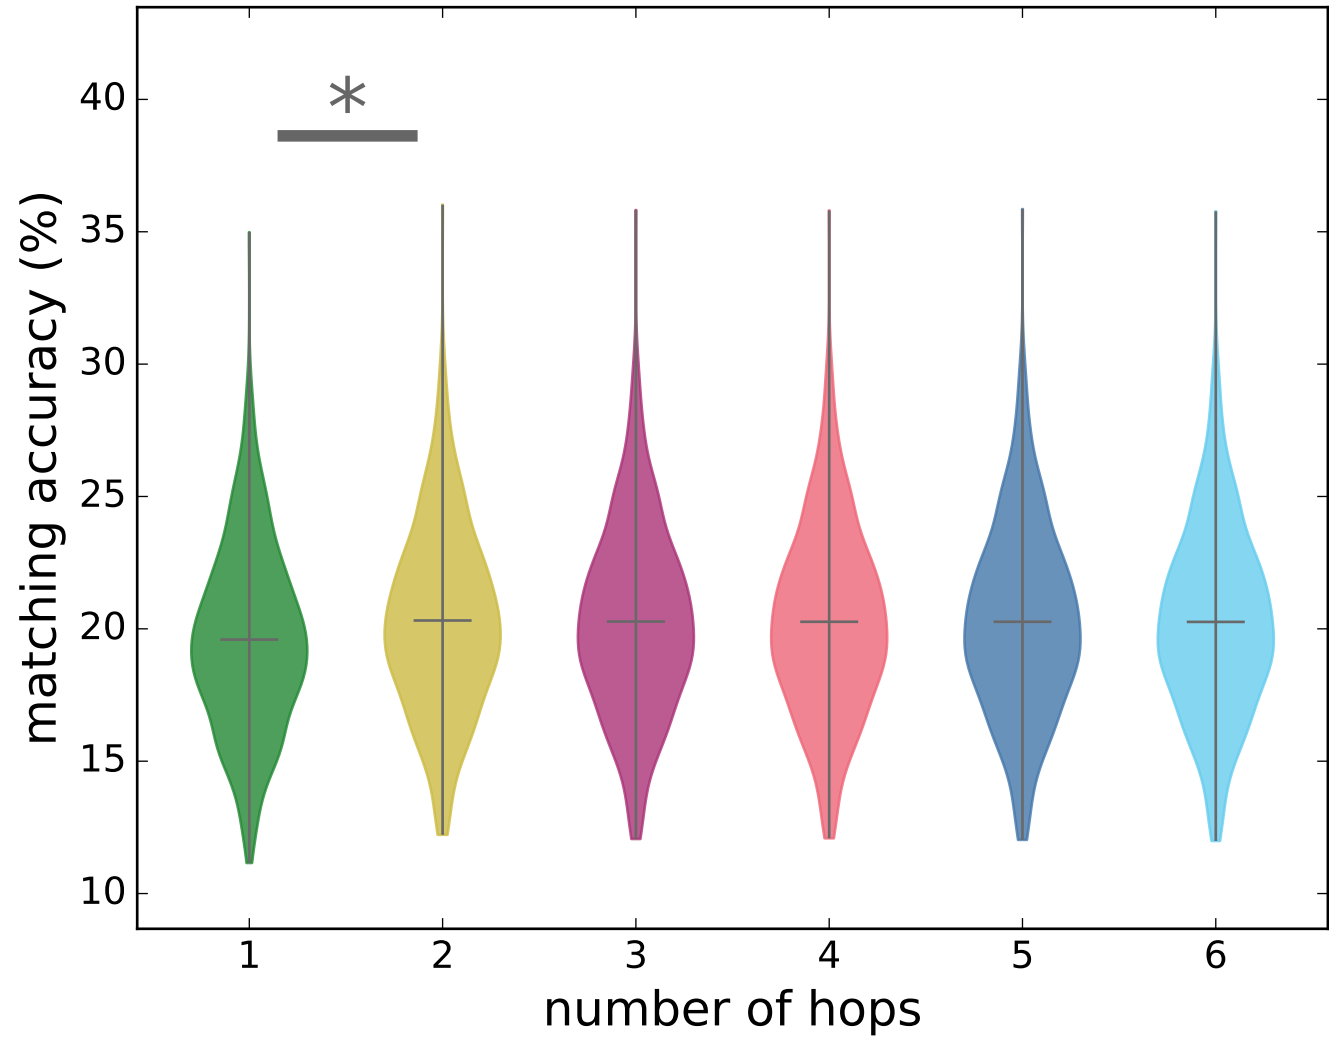

Supplement: NIHMS1530714-supplement-2.pdf [file NIHMS1530714-supplement-2.pdf]

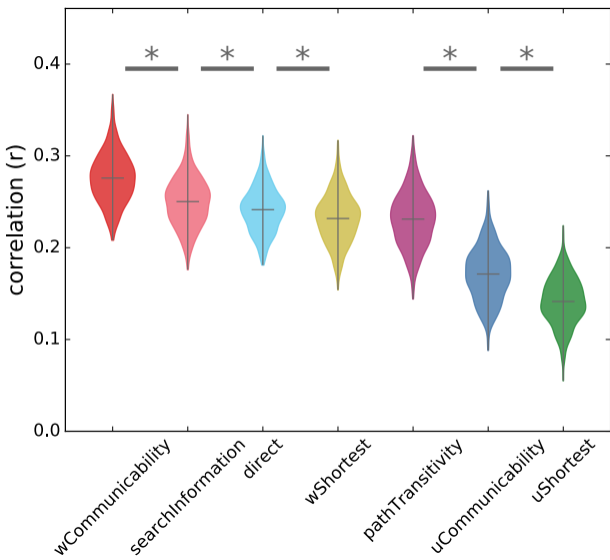

Supplement: NIHMS1530714-supplement-3.pdf [file NIHMS1530714-supplement-3.pdf]

Lausanne129 Lausanne234

Lausanne463 Schaefer400

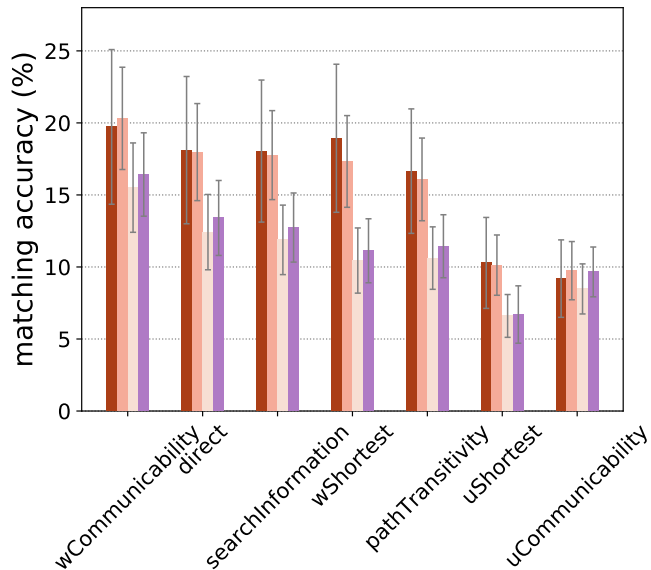

(a)

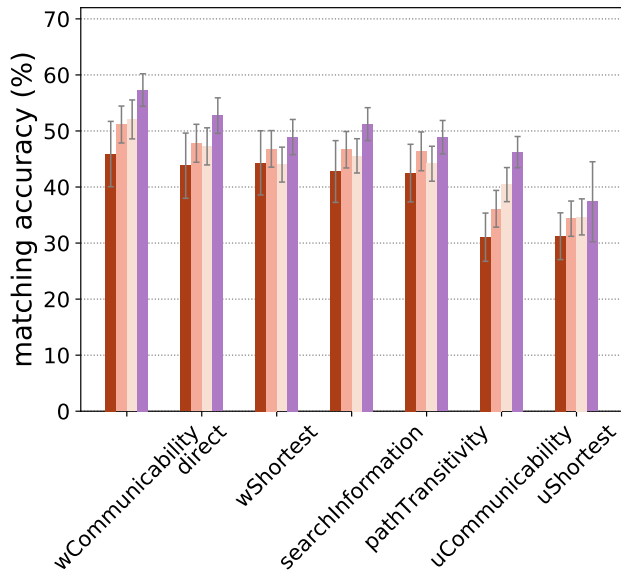

(b)

Supplement: NIHMS1530714-supplement-4.pdf [file NIHMS1530714-supplement-4.pdf]
